# Supplementary material for: Lanthanide radii controlled one-dimensional polymer and dinuclear complexes and their fluorescent properties
Source: Royal Society of Chemistry journal article supplement (doi:10.1039/c0dt01350a), 2011-01-01
Supplement: c0dt01350a.pdf [file c0dt01350a.pdf]

Supplementary Material (ESI) for Dalton Transactions  
This journal is (c) The Royal Society of Chemistry 2011

Electronic Supplementary Information (ESI)

Lanthanide Radii Controlled One-Dimensional Coordination Polymers Structure and  
Fluorescent Properties

Table S1. Selected Bond Lengths (Å) for Complexes 1-6<sup>a</sup>

| Complex 1     |          |               |            |
|---------------|----------|---------------|------------|
| Ce(1)-O(4)#1  | 2.491(3) | Ce(1)-O(10)#3 | 2.5516(10) |
| Ce(1)-O(4)#2  | 2.491(3) | Ce(1)-O(10)   | 2.5516(10) |
| Ce(1)-O(8A)   | 2.50(5)  | Ce(1)-O(7)    | 2.588(3)   |
| Ce(1)-O(8A)#3 | 2.50(5)  | Ce(1)-O(7)#3  | 2.588(3)   |
| Ce(1)-O(1)    | 2.504(3) | Ce(1)-O(8B)   | 2.73(4)    |
| Ce(1)-O(1)#3  | 2.504(3) | Ce(1)-O(8B)#3 | 2.73(4)    |
| Complex 2     |          |               |            |
| Nd(1)-O(16)   | 2.364(2) | Nd(1)-O(11)   | 2.527(3)   |
| Nd(1)-O(4)#1  | 2.406(2) | Nd(1)-O(8)    | 2.531(3)   |
| Nd(1)-O(1)    | 2.413(2) | Nd(1)-O(14)   | 2.537(3)   |
| Nd(1)-O(13)   | 2.514(3) | Nd(1)-O(10)   | 2.551(3)   |
| Nd(1)-O(7)    | 2.527(3) |               |            |
| Complex 3     |          |               |            |
| Sm(1)-O(7)    | 2.337(4) | Sm(1)-O(10)   | 2.506(5)   |
| Sm(1)-O(1)    | 2.341(4) | Sm(1)-O(14)   | 2.508(5)   |
| Sm(1)-O(4)#1  | 2.382(4) | Sm(1)-O(13)   | 2.524(5)   |
| Sm(1)-O(16)   | 2.479(5) | Sm(1)-O(18)   | 2.539(4)   |
| Sm(1)-O(12)   | 2.503(4) |               |            |
| Complex 4     |          |               |            |
| Eu(1)-O(7)    | 2.322(6) | Eu(1)-O(11)   | 2.495(7)   |
| Eu(1)-O(1)    | 2.371(5) | Eu(1)-O(18)   | 2.505(5)   |
| Eu(1)-O(4)#1  | 2.396(5) | Eu(1)-O(12)   | 2.508(6)   |
| Eu(1)-O(17)   | 2.482(5) | Eu(1)-O(14)   | 2.508(6)   |
| Eu(1)-O(15)   | 2.494(5) |               |            |
| Complex 5     |          |               |            |
| Dy(1)-O(4)    | 2.263(4) | Dy(1)-O(12)   | 2.463(5)   |
| Dy(1)-O(1)    | 2.284(5) | Dy(1)-O(11)   | 2.476(5)   |
| Dy(1)-O(7)    | 2.323(5) | Dy(1)-O(9)    | 2.477(5)   |
| Dy(1)-O(15)   | 2.388(5) | Dy(1)-O(14)   | 2.480(5)   |
| Dy(1)-O(8)    | 2.457(6) |               |            |
| Complex 6     |          |               |            |
| Er(1)-O(7)    | 2.238(4) | Er(1)-O(10)   | 2.454(5)   |
| Er(1)-O(4)    | 2.243(4) | Er(1)-O(15)   | 2.462(5)   |
| Er(1)-O(19)   | 2.338(5) | Er(1)-O(16)   | 2.469(5)   |
| Er(1)-O(11)   | 2.406(5) | Er(1)-O(13)   | 2.478(4)   |
| Er(1)-O(18)   | 2.406(5) |               |            |

<sup>a</sup> Symmetry codes for 1: #1 -x+1,-y,-z, #2 x,-y,z-1/2, #3 -x+1,y,-z-1/2. 2: #1 -x+1,-y,-z. 3: #1 -x,-y,-z+1. 4: #1 -x+1,-y+1,-z+2. 5:

FigureS1. Perspective view of the coordination environment of the complexes 1-6.

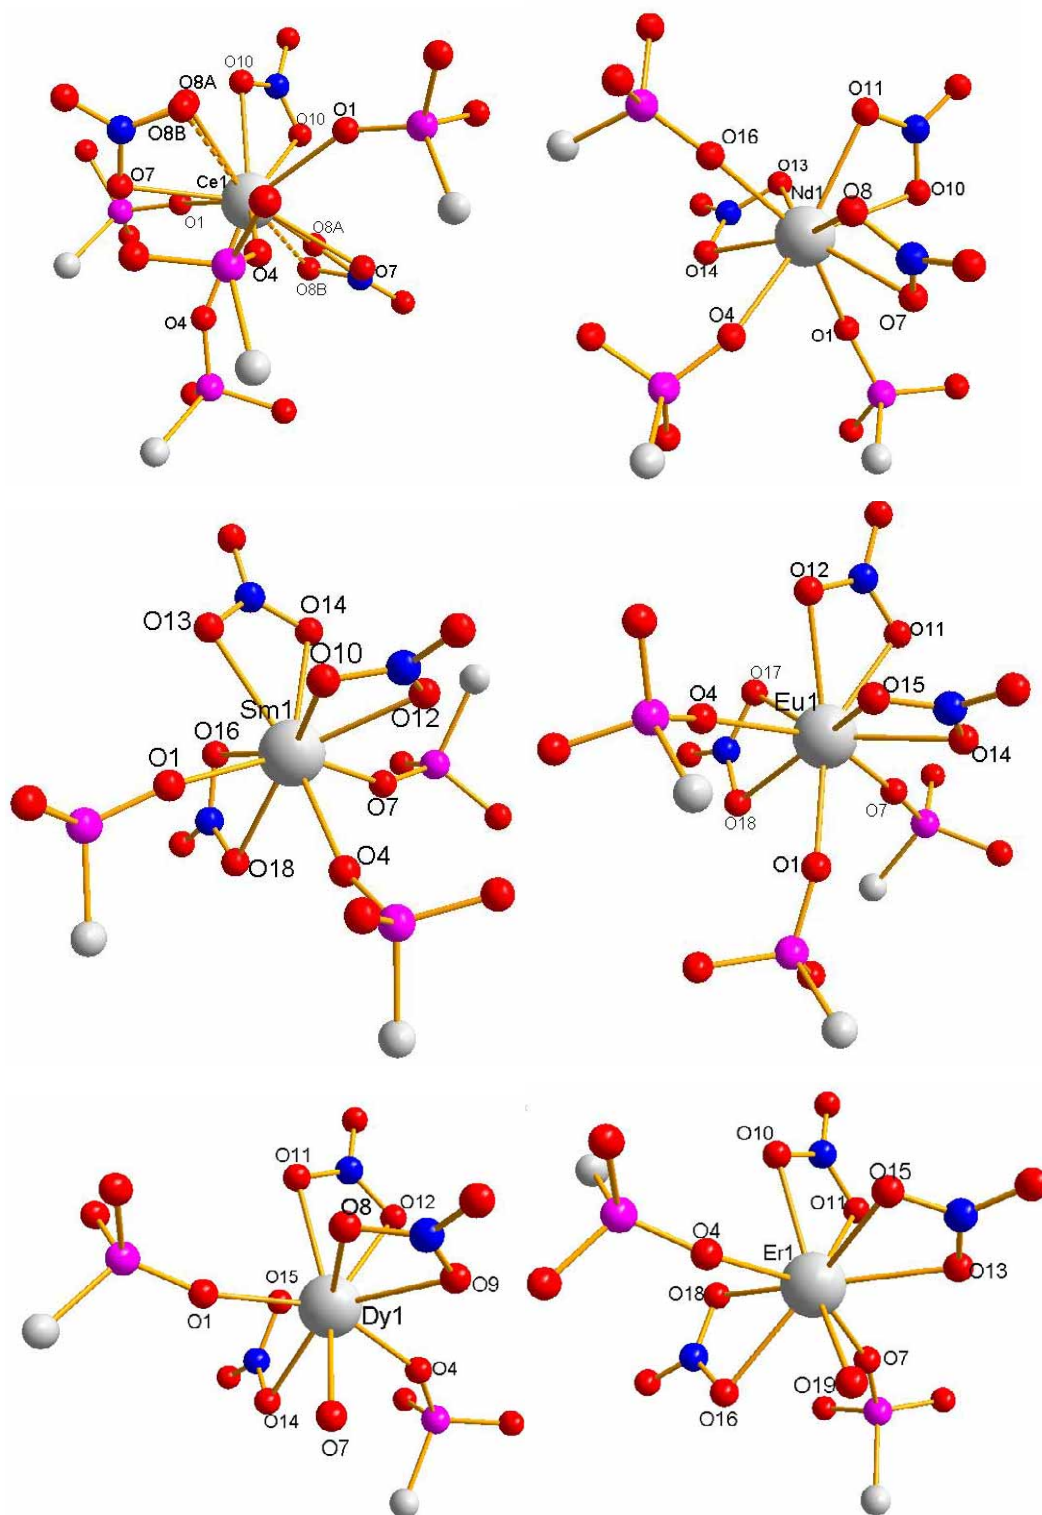

Table S2. Hydrogen Bonding Parameters (Å and °) of 5 and 6.

| D-H...A          | D-H  | H...A | D...A    | ∠D-H...A |
|------------------|------|-------|----------|----------|
|                  |      | 5     |          |          |
| O(7)-H...O(13a)  | 0.89 | 1.93  | 2.815(8) | 170      |
| O(7)-H...O(10b)  | 0.78 | 2.14  | 2.837(9) | 148      |
|                  |      | 6     |          |          |
| O(19)-H...O(14a) | 0.86 | 2.17  | 2.906(7) | 143      |
| O(19)-H...O(1b)  | 0.86 | 2.06  | 2.635(6) | 123      |

<sup>a</sup> Symmetry code, 5: a, x-1, y, z ; b, -x, -y+1, -z. 6 : a, -x+1, -y+1, -z+1; b, -x+1, -y+1, -z

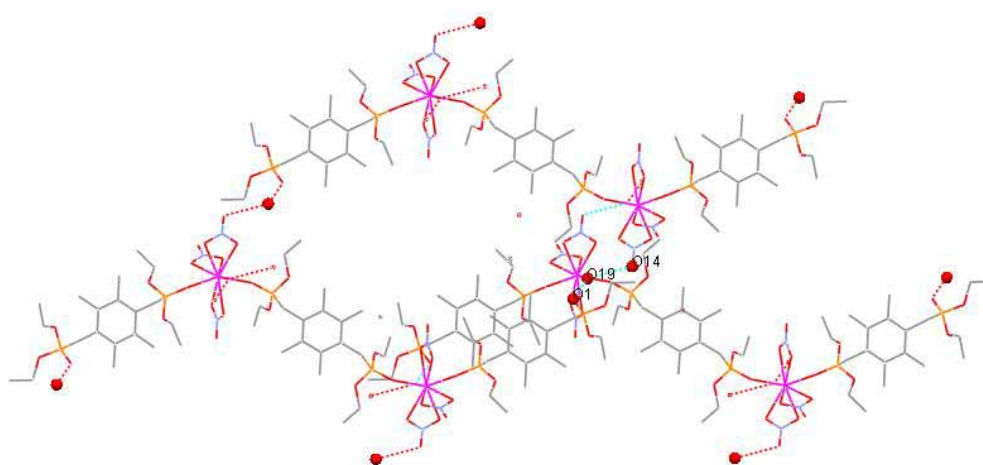

Figure S2. Hydrogen Bonding in complex 6

The elemental analysis and IR datas of Tb<sup>3+</sup> complex

Anal. Calcd for [Tb(NO<sub>3</sub>)<sub>3</sub>LH<sub>2</sub>O]<sub>n</sub> : C, 30.12; H, 4.80; N, 5.27%. Found: C, 30.01; H, 4.68; N, 5.21%.

IR (KBr, cm<sup>-1</sup>): 3422(m), 2986(m), 2934(m), 1739(w), 1624(w), 1492(s), 1387(m), 1307(m), 1229(m), 1171(s), 1028(s), 976(m), 811(w), 795(w), 741(w), 661(w), 587(w), 500(w).

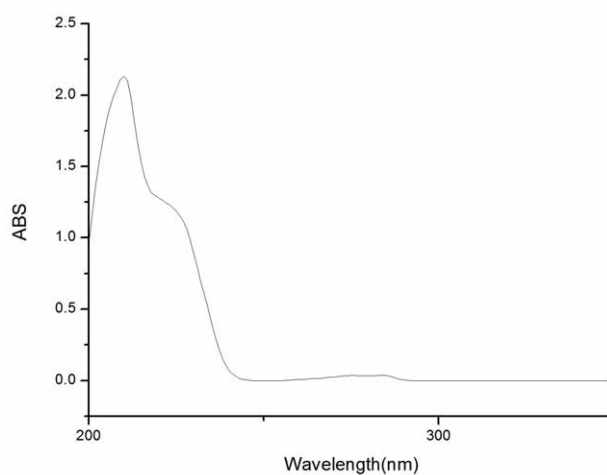

Figure S3. The absorption spectra of the ligand in ethyl acetate ( $1 \times 10^{-4}$  M).

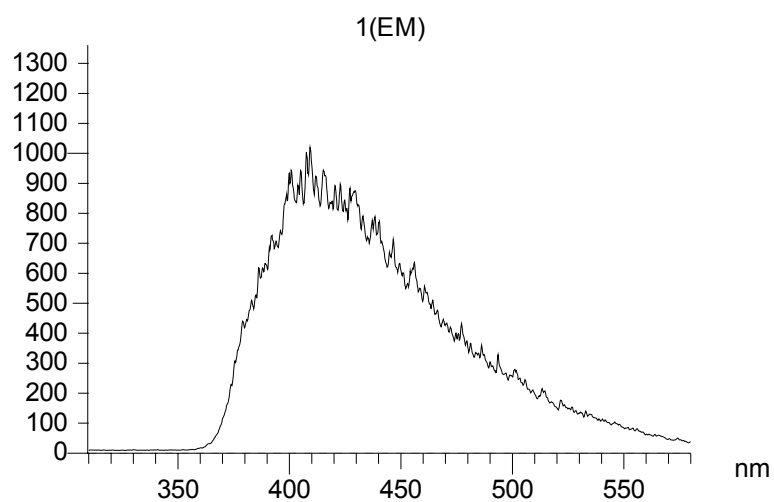

Figure S4. Phosphorescence spectrum of  $Gd^{3+}$  complex of the ligand excited at 294 nm at 77K.
